# Supplementary material for: Association of the Glycemic Fluctuation as well as Glycemic Control with the Pancreatic β-cell Function in Japanese Subjects with Type 2 Diabetes Mellitus
Source: PubMed Central journal article supplement — Intern Med. 2018 Aug 24;58(2):167–73. doi: 10.2169/internalmedicine.1053-18 (PMC6378157; doi:10.2169/internalmedicine.1053-18), 2018-08-24
Supplement: 1349-7235-58-0167-s001.pdf [file 1349-7235-58-0167-s001.pdf]

Supplemental material 1. Clinical characteristics of the subjects in this study

| Clinical parameter              | All subjects  | < 65 years old | ≥ 65 years old |
|---------------------------------|---------------|----------------|----------------|
| Number (male/female)            | 372 (209/163) | 210 (117/93)   | 162 (92/70)    |
| Age (years old)                 | 60.2 ± 14.5   | 50.1 ± 10.7    | 73.3 ± 5.4     |
| BMI (kg/m <sup>2</sup> )        | 25.7 ± 5.2    | 27.1 ± 5.6     | 23.9 ± 4.0     |
| Duration of diabetes (years)    | 11.4 ± 9.2    | 8.7 ± 8.3      | 14.9 ± 9.1     |
| HbA1c (%)                       | 9.3 ± 1.8     | 9.7 ± 2.0      | 8.9 ± 1.5      |
| Glycoalbumin (%)                | 26.5 ± 7.5    | 26.2 ± 8.1     | 26.9 ± 6.8     |
| Fasting plasma glucose (mg/dL)  | 173.3 ± 67.2  | 179.0 ± 64.4   | 165.8 ± 70.2   |
| GA/HbA1c ratio                  | 2.82 ± 0.52   | 2.68 ± 0.49    | 3.00 ± 0.50    |
| HOMA-%β                         | 46.6 ± 39.8   | 50.2 ± 43.4    | 42.0 ± 34.3    |
| Systolic blood pressure (mmHg)  | 130.6 ± 15.4  | 131.2 ± 16.5   | 129.8 ± 13.8   |
| Diastolic blood pressure (mmHg) | 72.5 ± 9.9    | 74.2 ± 9.9     | 70.3 ± 9.5     |
| Total cholesterol (mg/dL)       | 197.5 ± 39.8  | 200.9 ± 40.0   | 193.1 ± 39.3   |
| LDL cholesterol (mg/dL)         | 120.4 ± 33.8  | 124.3 ± 34.4   | 115.5 ± 32.5   |
| HDL cholesterol (mg/dL)         | 50.9 ± 18.3   | 47.9 ± 17.6    | 55.0 ± 18.4    |
| Triglyceride (mg/dL)            | 135.3 ± 71.8  | 151.9 ± 78.9   | 114.2 ± 55.2   |
| Apolipoprotein B (mg/dL)        | 99.4 ± 24.9   | 104.8 ± 25.4   | 92.7 ± 22.5    |
| Apolipoprotein E (mg/dL)        | 4.46 ± 2.97   | 4.40 ± 1.16    | 4.52 ± 4.28    |
| Creatinine (mg/dL)              | 0.73 ± 0.23   | 0.67 ± 0.19    | 0.79 ± 0.25    |
| BUN (mg/dL)                     | 17.1 ± 7.3    | 15.2 ± 5.5     | 19.4 ± 8.6     |
| CRP (mg/dL)                     | 0.61 ± 1.84   | 0.54 ± 1.50    | 0.71 ± 2.22    |
| Urinary albumin (mg/gCre)       | 31.4 ± 46.7   | 25.3 ± 35.7    | 39.6 ± 55.9    |

Abbreviations: BMI, body mass index; GA, glycoalbumin; HOMA, homeostasis model assessment; LDL, Low-density lipoprotein; HDL, high-density lipoprotein; CRP, C-reactive protein. Data are shown as mean ± SD.
