# Supplementary material for: Association of the Glycemic Fluctuation as well as Glycemic Control with the Pancreatic β-cell Function in Japanese Subjects with Type 2 Diabetes Mellitus
Source: PubMed Central journal article supplement — Intern Med. 2018 Aug 24;58(2):167–73. doi: 10.2169/internalmedicine.1053-18 (PMC6378157; doi:10.2169/internalmedicine.1053-18), 2018-08-24
Supplement: 1349-7235-58-0167-s002B.pdf [file 1349-7235-58-0167-s002B.pdf]

Supplemental material 2B. Multivariate analysis evaluating the association between HOMA-% $\beta$  and various clinical parameters including HbA1c in all subjects

| Model 1              | All subjects |       |          | < 65 years old |       |          | $\geq$ 65 years old |       |          |
|----------------------|--------------|-------|----------|----------------|-------|----------|---------------------|-------|----------|
| Clinical Parameter   | $\beta$      | t     | <i>p</i> | $\beta$        | t     | <i>p</i> | $\beta$             | t     | <i>p</i> |
| Age                  | -0.106       | -2.03 | 0.043    | -0.094         | -1.39 | n.s.     | -0.003              | -0.04 | n.s.     |
| Gender               | -0.001       | -0.01 | n.s.     | 0.030          | -0.47 | n.s.     | 0.041               | 0.56  | n.s.     |
| BMI                  | 0.273        | 5.28  | <0.0001  | 0.244          | 3.61  | 0.001    | 0.283               | 3.83  | 0.0002   |
| HbA1c                | -0.349       | -7.25 | <0.0001  | -0.390         | -6.18 | <0.0001  | -0.264              | -3.61 | 0.0004   |
| Model 2              | All subjects |       |          | < 65 years old |       |          | $\geq$ 65 years old |       |          |
| Clinical Parameter   | $\beta$      | t     | <i>p</i> | $\beta$        | t     | <i>p</i> | $\beta$             | t     | <i>p</i> |
| BMI                  | 0.198        | 3.66  | 0.0003   | 0.170          | 2.35  | 0.020    | 0.211               | 2.58  | 0.011    |
| HbA1c                | -0.346       | -6.52 | <0.0001  | -0.394         | -5.57 | <0.000   | -0.266              | -3.25 | 0.002    |
| Duration of diabetes | -0.232       | -4.28 | <0.0001  | -0.171         | -2.37 | 0.019    | -0.277              | -3.38 | 0.001    |
| Model 3              | All subjects |       |          | < 65 years old |       |          | $\geq$ 65 years old |       |          |
| Clinical Parameter   | $\beta$      | t     | <i>p</i> | $\beta$        | t     | <i>p</i> | $\beta$             | t     | <i>p</i> |
| Age                  | 0.037        | 0.57  | n.s.     | 0.089          | 1.10  | n.s.     | 0.090               | 1.07  | n.s.     |
| Gender               | -0.008       | -0.15 | n.s.     | -0.043         | -0.59 | n.s.     | 0.037               | 0.45  | n.s.     |
| BMI                  | 0.211        | 3.60  | 0.0004   | 0.205          | 2.64  | 0.009    | 0.214               | 2.60  | 0.011    |
| HbA1c                | -0.339       | -6.17 | <0.0001  | -0.385         | -5.26 | <0.0001  | -0.268              | -3.26 | 0.002    |
| Duration of diabetes | -0.245       | -4.15 | <0.0001  | -0.196         | -2.58 | 0.011    | -0.296              | -3.53 | 0.001    |
| Model 4              | All subjects |       |          | < 65 years old |       |          | $\geq$ 65 years old |       |          |
| Clinical Parameter   | $\beta$      | t     | <i>p</i> | $\beta$        | t     | <i>p</i> | $\beta$             | t     | <i>p</i> |
| Age                  | 0.001        | 0.02  | n.s.     | 0.067          | 0.80  | n.s.     | 0.073               | 0.88  | n.s.     |
| Gender               | -0.015       | -0.28 | n.s.     | -0.059         | -0.79 | n.s.     | 0.050               | 0.61  | n.s.     |
| BMI                  | 0.169        | 2.73  | 0.007    | 0.168          | 2.06  | 0.041    | 0.160               | 1.82  | n.s.     |
| HbA1c                | -0.335       | -6.06 | <0.0001  | -0.393         | -5.32 | <0.0001  | -0.241              | -2.93 | 0.004    |
| Duration of diabetes | -0.250       | -4.27 | <0.0001  | -0.201         | -2.64 | 0.009    | -0.317              | -3.80 | 0.0002   |
| Hypertension         | -0.100       | -1.74 | n.s.     | -0.059         | -0.79 | n.s.     | -0.184              | -2.13 | 0.035    |
| Dyslipidemia         | -0.067       | -1.20 | n.s.     | -0.093         | -1.26 | n.s.     | -0.0236             | -0.27 | n.s.     |

Abbreviations: BMI, body mass index; GA, glycoalbumin; n.s. not significant.
