# Supplementary material for: Association of the Glycemic Fluctuation as well as Glycemic Control with the Pancreatic β-cell Function in Japanese Subjects with Type 2 Diabetes Mellitus
Source: PubMed Central journal article supplement — Intern Med. 2018 Aug 24;58(2):167–73. doi: 10.2169/internalmedicine.1053-18 (PMC6378157; doi:10.2169/internalmedicine.1053-18), 2018-08-24
Supplement: 1349-7235-58-0167-s003.pdf [file 1349-7235-58-0167-s003.pdf]

Supplemental material 3. Clinical characteristics of the subjects without using insulin secretagogues

| Clinical parameter              | All subjects  | < 65 years old | ≥ 65 years old |
|---------------------------------|---------------|----------------|----------------|
| Number (male/female)            | 276 (152/115) | 158 (89/69)    | 109 (63/46)    |
| Age (years old)                 | 58.8 ± 14.8   | 49.2 ± 11.1    | 72.8 ± 4.8     |
| BMI (kg/m <sup>2</sup> )        | 25.9 ± 5.5    | 27.4 ± 5.7     | 23.9 ± 4.3     |
| Duration of diabetes (years)    | 10.8 ± 8.8    | 7.9 ± 7.5      | 15.0 ± 8.9     |
| <b>Medication</b>               |               |                |                |
| Metformin                       | 96 (25.8 %)   | 59 (28.1 %)    | 37 (22.8 %)    |
| Thiazolidinediones              | 68 (18.3 %)   | 37 (17.6 %)    | 31 (19.1 %)    |
| Sulfonylurea                    | 104 (28.0 %)  | 51 (24.3 %)    | 53 (52.7 %)    |
| Glinide                         | 32 (8.6%)     | 15 (7.1 %)     | 17 (10.5 %)    |
| DPP-4 inhibitors                | 4 (1.1 %)     | 2 (1.0 %)      | 2 (1.2 %)      |
| Alpha-glucosidases inhibitor    | 63 (16.9 %)   | 27 (12.9 %)    | 36 (22.2 %)    |
| HbA1c (%)                       | 9.5 ± 2.0     | 9.9 ± 2.1      | 9.0 ± 1.7      |
| Glycoalbumin (%)                | 26.7 ± 7.7    | 26.6 ± 8.4     | 26.8 ± 6.5     |
| Fasting plasma glucose (mg/dL)  | 175.9 ± 67.9  | 180.0 ± 62.2   | 170.6 ± 75.3   |
| GA/HbA1c ratio                  | 2.81 ± 0.51   | 2.70 ± 0.50    | 2.99 ± 0.48    |
| HOMA-%β                         | 46.2 ± 40.8   | 49.2 ± 43.2    | 41.8 ± 37.0    |
| Systolic blood pressure (mmHg)  | 129.8 ± 15.8  | 130.9 ± 17.1   | 128.2 ± 13.6   |
| Diastolic blood pressure (mmHg) | 72.2 ± 9.5    | 73.5 ± 9.7     | 70.4 ± 8.9     |
| Total cholesterol (mg/dL)       | 199.7 ± 40.3  | 202.9 ± 40.1   | 195.0 ± 40.3   |
| LDL cholesterol (mg/dL)         | 121.7 ± 35.0  | 125.5 ± 34.7   | 116.4 ± 35.0   |
| HDL cholesterol (mg/dL)         | 51.2 ± 17.8   | 47.8 ± 16.3    | 56.3 ± 18.9    |
| Triglyceride (mg/dL)            | 137.0 ± 73.6  | 151.4 ± 78.9   | 116.8 ± 60.1   |
| Apolipoprotein B (mg/dL)        | 99.6 ± 26.6   | 105.0 ± 26.6   | 91.8 ± 24.9    |
| Apolipoprotein E (mg/dL)        | 4.54 ± 3.47   | 4.38 ± 1.15    | 4.79 ± 5.27    |
| Creatinine (mg/dL)              | 0.74 ± 0.25   | 0.68 ± 0.20    | 0.83 ± 0.27    |
| BUN (mg/dL)                     | 17.0 ± 7.6    | 14.9 ± 4.6     | 20.0 ± 9.8     |
| CRP (mg/dL)                     | 0.56 ± 1.43   | 0.61 ± 1.61    | 0.49 ± 1.14    |
| Urinary albumin (mg/gCre)       | 42.1 ± 86.8   | 47.4 ± 106.7   | 35.4 ± 50.1    |

Abbreviations: BMI, body mass index; GA, glycoalbumin; HOMA, homeostasis model assessment; LDL, Low-density lipoprotein; **DPP-4, Dipeptidyl-peptidase-4;**  
HDL, high-density lipoprotein; CRP, C-reactive protein. Data are shown as mean  $\pm$  SD.
