# Supplementary material for: Association of the Glycemic Fluctuation as well as Glycemic Control with the Pancreatic β-cell Function in Japanese Subjects with Type 2 Diabetes Mellitus
Source: PubMed Central journal article supplement — Intern Med. 2018 Aug 24;58(2):167–73. doi: 10.2169/internalmedicine.1053-18 (PMC6378157; doi:10.2169/internalmedicine.1053-18), 2018-08-24
Supplement: 1349-7235-58-0167-s004A.pdf [file 1349-7235-58-0167-s004A.pdf]

Supplemental material 4A. Multivariate analysis evaluating the association between HOMA-% $\beta$  and various clinical parameters including glycoalbumin in all subjects without using insulin secretagogues

| Model 1              | All subjects |       |          | < 65 years old |       |          | $\geq$ 65 years old |       |          |
|----------------------|--------------|-------|----------|----------------|-------|----------|---------------------|-------|----------|
| Clinical Parameter   | $\beta$      | t     | <i>p</i> | $\beta$        | t     | <i>p</i> | $\beta$             | t     | <i>p</i> |
| Age                  | -0.044       | -0.78 | n.s.     | -0.070         | -0.96 | n.s.     | 0.064               | 0.76  | n.s.     |
| Gender               | -0.015       | -0.28 | n.s.     | -0.030         | -0.43 | n.s.     | 0.008               | 0.10  | n.s.     |
| BMI                  | 0.166        | 2.67  | 0.008    | 0.147          | 1.86  | n.s.     | 0.149               | 1.63  | n.s.     |
| Glycoalbumin         | -0.467       | -8.41 | <0.0001  | -0.486         | -6.65 | <0.0001  | -0.460              | -5.09 | <0.0001  |
| Model 2              | All subjects |       |          | < 65 years old |       |          | $\geq$ 65 years old |       |          |
| Clinical Parameter   | $\beta$      | t     | <i>p</i> | $\beta$        | t     | <i>p</i> | $\beta$             | t     | <i>p</i> |
| BMI                  | 0.080        | 1.23  | n.s.     | 0.071          | 0.84  | n.s.     | 0.114               | 1.12  | n.s.     |
| Glycoalbumin         | -0.471       | -7.29 | <0.0001  | -0.487         | -5.72 | <0.0001  | -0.437              | -4.28 | <0.0001  |
| Duration of diabetes | -0.154       | -2.52 | 0.013    | -0.147         | -1.84 | n.s.     | -0.170              | -1.74 | n.s.     |
| Model 3              | All subjects |       |          | < 65 years old |       |          | $\geq$ 65 years old |       |          |
| Clinical Parameter   | $\beta$      | t     | <i>p</i> | $\beta$        | t     | <i>p</i> | $\beta$             | t     | <i>p</i> |
| Age                  | 0.105        | 1.41  | n.s.     | 0.100          | 1.10  | n.s.     | 0.151               | 1.50  | n.s.     |
| Gender               | -0.044       | -0.71 | n.s.     | -0.061         | -0.74 | n.s.     | -0.006              | -0.06 | n.s.     |
| BMI                  | 0.128        | 1.78  | n.s.     | 0.118          | 1.28  | n.s.     | 0.116               | 1.13  | n.s.     |
| Glycoalbumin         | -0.461       | -7.04 | <0.0001  | -0.477         | -5.40 | <0.0001  | -0.453              | -4.42 | <0.0001  |
| Duration of diabetes | -0.194       | -2.82 | 0.005    | -0.176         | -2.08 | 0.039    | -0.194              | -1.92 | n.s.     |
| Model 4              | All subjects |       |          | < 65 years old |       |          | $\geq$ 65 years old |       |          |
| Clinical Parameter   | $\beta$      | t     | <i>p</i> | $\beta$        | t     | <i>p</i> | $\beta$             | t     | <i>p</i> |
| Age                  | 0.088        | 1.13  | n.s.     | 0.091          | 0.97  | n.s.     | 0.150               | 1.49  | n.s.     |
| Gender               | -0.046       | -0.74 | n.s.     | -0.067         | -0.79 | n.s.     | 0.013               | 0.13  | n.s.     |
| BMI                  | 0.103        | 1.36  | n.s.     | 0.108          | 1.10  | n.s.     | 0.062               | 0.56  | n.s.     |
| Glycoalbumin         | -0.455       | -6.87 | <0.0001  | -0.476         | -5.34 | <0.0001  | -0.431              | -4.07 | <0.0001  |
| Duration of diabetes | -0.200       | -2.89 | 0.004    | -0.178         | -2.08 | 0.040    | -0.211              | -2.06 | 0.043    |
| Hypertension         | -0.046       | -0.71 | n.s.     | -0.028         | -0.33 | n.s.     | -0.086              | -0.79 | n.s.     |
| Dyslipidemia         | -0.045       | -0.70 | n.s.     | -0.016         | -0.19 | n.s.     | -0.107              | -1.03 | n.s.     |

Abbreviations: BMI, body mass index; GA, glycoalbumin; n.s. not significant.
