# Supplementary material for: Association of the Glycemic Fluctuation as well as Glycemic Control with the Pancreatic β-cell Function in Japanese Subjects with Type 2 Diabetes Mellitus
Source: PubMed Central journal article supplement — Intern Med. 2018 Aug 24;58(2):167–73. doi: 10.2169/internalmedicine.1053-18 (PMC6378157; doi:10.2169/internalmedicine.1053-18), 2018-08-24
Supplement: 1349-7235-58-0167-s004B.pdf [file 1349-7235-58-0167-s004B.pdf]

Supplemental material 4B. Multivariate analysis evaluating the association between HOMA-% $\beta$  and various clinical parameters including HbA1c in all subjects without using insulin secretagogues

| Model 1              | All subjects |       |          | < 65 years old |       |          | $\geq$ 65 years old |       |          |
|----------------------|--------------|-------|----------|----------------|-------|----------|---------------------|-------|----------|
| Clinical Parameter   | $\beta$      | t     | <i>p</i> | $\beta$        | t     | <i>p</i> | $\beta$             | t     | <i>p</i> |
| Age                  | -0.098       | -1.62 | n.s.     | -0.106         | -1.44 | n.s.     | 0.022               | 0.25  | n.s.     |
| Gender               | -0.009       | -0.16 | n.s.     | -0.020         | -0.28 | n.s.     | 0.002               | 0.02  | n.s.     |
| BMI                  | 0.304        | 5.04  | <0.0001  | 0.271          | 3.61  | 0.000    | 0.299               | 3.28  | 0.001    |
| HbA1c                | -0.392       | -7.10 | <0.0001  | -0.445         | -6.41 | <0.0001  | -0.277              | -3.10 | 0.003    |
| Model 2              | All subjects |       |          | < 65 years old |       |          | $\geq$ 65 years old |       |          |
| Clinical Parameter   | $\beta$      | t     | <i>p</i> | $\beta$        | t     | <i>p</i> | $\beta$             | t     | <i>p</i> |
| BMI                  | 0.243        | 3.85  | 0.000    | 0.072          | 0.72  | n.s.     | 0.236               | 2.29  | 0.025    |
| HbA1c                | -0.396       | -6.37 | <0.0001  | -0.358         | -3.60 | 0.001    | -0.299              | -2.89 | 0.005    |
| Duration of diabetes | -0.187       | -2.96 | 0.004    | -0.136         | -1.59 | n.s.     | -0.189              | -1.83 | n.s.     |
| Model 3              | All subjects |       |          | < 65 years old |       |          | $\geq$ 65 years old |       |          |
| Clinical Parameter   | $\beta$      | t     | <i>p</i> | $\beta$        | t     | <i>p</i> | $\beta$             | t     | <i>p</i> |
| Age                  | 0.078        | 0.99  | n.s.     | 0.089          | 0.98  | n.s.     | 0.146               | 1.37  | n.s.     |
| Gender               | -0.041       | -0.64 | n.s.     | -0.065         | -0.79 | n.s.     | -0.009              | -0.08 | n.s.     |
| BMI                  | 0.277        | 4.01  | <0.0001  | 0.266          | 3.07  | 0.003    | 0.242               | 2.34  | 0.022    |
| HbA1c                | -0.385       | -5.99 | <0.0001  | -0.437         | -5.28 | <0.0001  | -0.317              | -3.04 | 0.033    |
| Duration of diabetes | -0.214       | -3.03 | 0.003    | -0.187         | -2.21 | 0.030    | -0.211              | -1.98 | n.s.     |
| Model 4              | All subjects |       |          | < 65 years old |       |          | $\geq$ 65 years old |       |          |
| Clinical Parameter   | $\beta$      | t     | <i>p</i> | $\beta$        | t     | <i>p</i> | $\beta$             | t     | <i>p</i> |
| Age                  | 0.052        | 0.65  | n.s.     | 0.076          | 0.80  | n.s.     | 0.144               | 1.35  | n.s.     |
| Gender               | -0.045       | -0.70 | n.s.     | -0.078         | -0.93 | n.s.     | 0.018               | 0.17  | n.s.     |
| BMI                  | 0.235        | 3.16  | 0.002    | 0.235          | 2.54  | 0.012    | 0.162               | 1.42  | n.s.     |
| HbA1c                | -0.386       | -5.96 | <0.0001  | -0.447         | -5.32 | <0.0001  | -0.297              | -2.82 | 0.006    |
| Duration of diabetes | -0.229       | -3.15 | 0.002    | -0.192         | -2.26 | 0.026    | -0.235              | -2.18 | 0.032    |
| Hypertension         | -0.058       | -0.86 | n.s.     | -0.031         | -0.37 | n.s.     | -0.128              | -1.13 | n.s.     |
| Dyslipidemia         | -0.084       | -1.29 | n.s.     | -0.078         | -0.92 | n.s.     | -0.125              | -1.15 | n.s.     |

Abbreviations: BMI, body mass index; GA, glycoalbumin; n.s. not significant.
